# Supplementary material
Source: MDPI journal article supplement (https://www.mdpi.com/2073-4441/14/11/1763)
Supplement: s1 [file s1]

## Supplementary document

**Table S1.** Capital costs of the proposed RWH system.

| Section                | Item                                                        | Suppliers                | Quantity                             | Cost per Unit        | Cost per Section    |
|------------------------|-------------------------------------------------------------|--------------------------|--------------------------------------|----------------------|---------------------|
| Rainwater collection   | Leaf eaters                                                 | The Tank Factory         | 1 item/house                         | AUD 70               | AUD 615             |
|                        | First flush diverters                                       | The Tank Factory         | 1 item/house                         | AUD 85               |                     |
|                        | Downpipes                                                   | Reece                    | 1 item/house                         | AUD 210              |                     |
|                        | Stormwater collection pipe (Product code: 1400380)          | Reece                    | 60 m/house                           | AUD 250              |                     |
| Rainwater storage tank | Rhino rural rainwater tank includes:                        |                          |                                      |                      |                     |
|                        | Tank (25–365 kL)                                            |                          |                                      | AUD 6066             | AUD 6066            |
|                        | Pad                                                         |                          | 1 item if $V_{max} \leq 365$ kL      | (25 kL)              | (25 kL)             |
|                        | Dust/vermin proofing seal                                   | Kingspan                 | 365 kL                               | –                    | –                   |
|                        | Fire fittings required by local governments                 |                          | Multiple items if $V_{max} > 365$ kL | AUD 28,322 (365 kL)  | AUD 28,322 (365 kL) |
|                        | Tank level gauge                                            |                          |                                      |                      |                     |
|                        | Exclusion zone                                              |                          |                                      |                      |                     |
| Rainwater treatment    | Bulk water 10% volume                                       |                          |                                      |                      |                     |
|                        | pH neutraliser (SKU: WF1034)                                | Pacific Water Technology | 1 item                               | AUD 2500             | AUD 20,410          |
|                        | Sediment filter (SKU: GT1-8WMW)                             | Filter Systems Australia | 1 item                               | AUD 260              |                     |
|                        | Heavy metal removal filter (SKU: WF021)                     | Pacific Water Technology | 1 item                               | AUD 5000             |                     |
|                        | UV lamp steriliser (SKU: UV0020)                            | Pacific Water Technology | 1 item                               | AUD 1500             |                     |
|                        | Jet pressure pumps (SKU: reef-prj80e)                       | The Tank Factory         | 2 items                              | AUD 575              |                     |
|                        | Drinking water storage tank and concrete base (SKU: R13500) | The Tank Factory         | 1 item                               | AUD 3000             |                     |
|                        | Solar energy system                                         | Local Solar              | 1 item                               | AUD 5000             |                     |
|                        | Protective fencing                                          | Local Fence              | 1 item                               | AUD 2000             |                     |
|                        | Drinking water distribution pipe (Product code: 1450650)    | Reece                    | 60 m/house                           | AUD 275              |                     |
| Drinking water supply  | Drinking water taps/dispensers                              | Reece                    | 1 item/house                         | AUD 100              | AUD 375             |
| Labour                 | Project manager with construction workers                   | Local Labour             | 1 h/house                            | AUD 100              |                     |
|                        |                                                             |                          |                                      | (AUS)<br>AUD 25 (VN) |                     |

**Table S2.** Replacement costs of the proposed RWH system.

| Replacement Items      | Frequency                          | Cost per Unit                     |
|------------------------|------------------------------------|-----------------------------------|
| Pipelines              | 25 years                           | AUD 525/house                     |
| Rainwater tank liner   | 20 years                           | AUD 606 (25 kL)–AUD 2832 (365 kL) |
| Drinking water tank    | 20 years                           | AUD 2075                          |
| Jet pressure pumps     | 10 years                           | AUD 575                           |
| Solar micro-inverters  | 10 years                           | AUD 1000                          |
| Metsorb® filter system | 10 years                           | AUD 5000                          |
| Sediment filter        | annually                           | AUD 80                            |
| Calcite media          | annually<br>(estimated 50 kg/year) | AUD 200                           |
| UV lamp                | annually<br>(lamp life 10,000 h)   | AUD 112                           |

**Table S3.** Maintenance costs of the proposed RWH system.

| Maintenance Items                  | Frequency | Quantity        | Cost per Unit |
|------------------------------------|-----------|-----------------|---------------|
| Roof catchments cleaning service   | annually  | 1 service/house | AUD 30        |
| Rainwater treatment system service | annually  | 1               | AUD 220       |
| Rainwater tank service             | 5 years   | 1               | AUD 616       |
| Drinking water tank service        | 5 years   | 1               | AUD 250       |

Data<sup>1</sup> are the number of households in the community.

**Table S4.** Economic parameters for use in the LCCA.

| Economic Parameters                   | Australia | Vietnam | Unit   |
|---------------------------------------|-----------|---------|--------|
| Interest rate                         | 4         | 4       | %      |
| Inflation rate                        | 2.3       | 4       | %      |
| Inflation rate of water               | 1.7       | 4       | %      |
| GST                                   | 10        | 10      | %      |
| Mains water costs (government policy) | 2.35      | 0.85    | AUD/kL |
| Bulk water costs (truck tankers)      | 120       | 30      | AUD/kL |
| Bottled water costs (wholesalers)     | 400       | 100     | AUD/kL |
